# Supplementary material
Source: PubMed Central journal article supplement (PMC552962)

Fig.S1-A

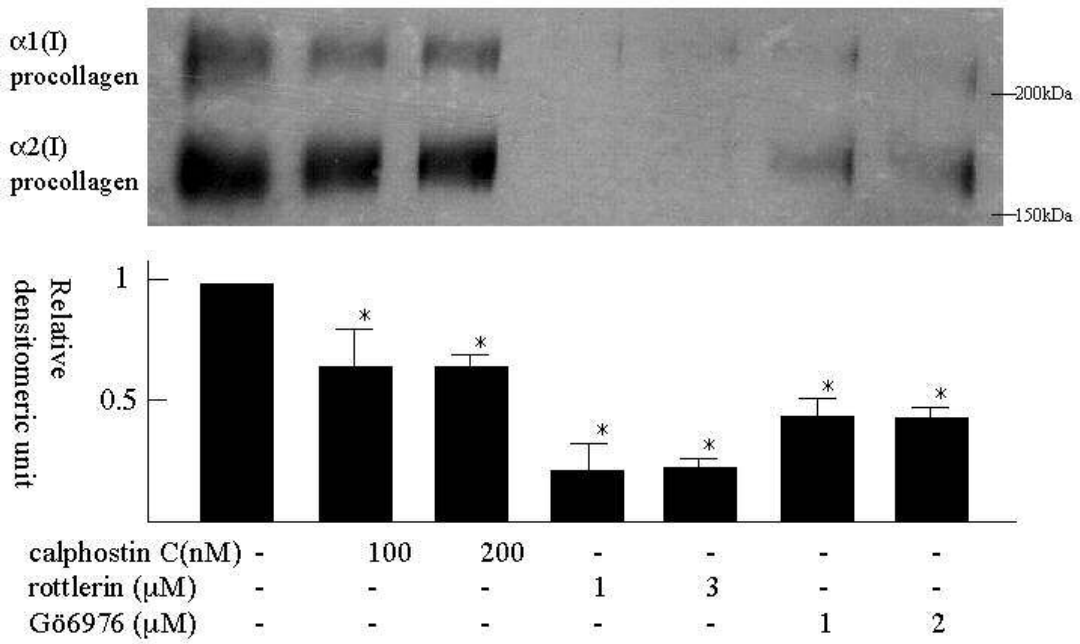

Fig.S1-B

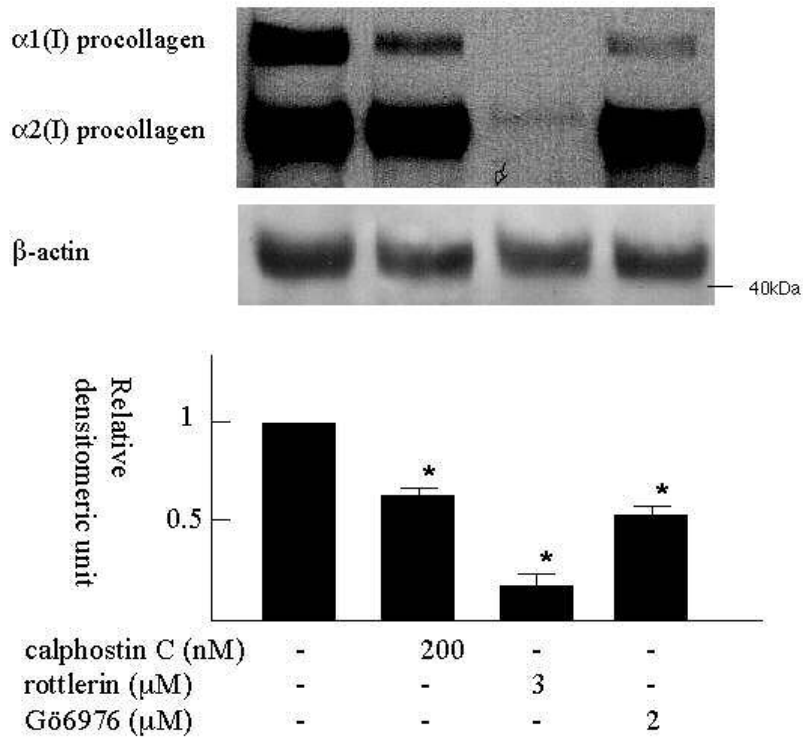

Fig.S1-C

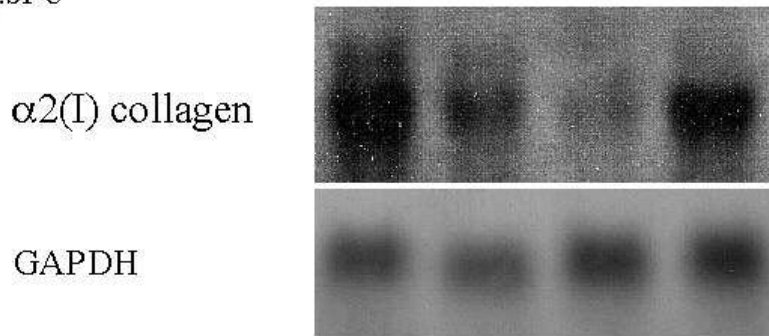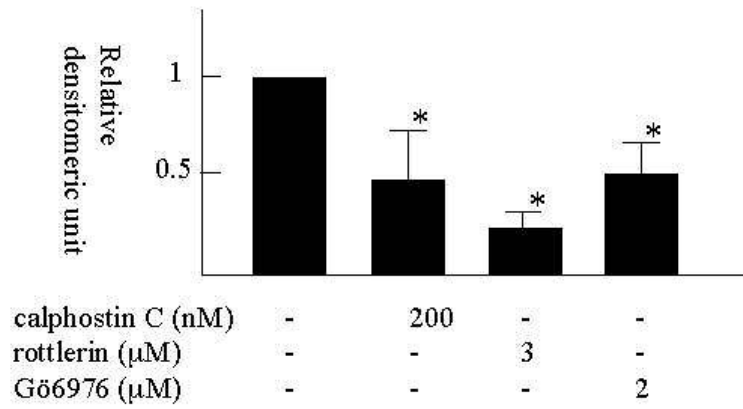

Fig.S1-D

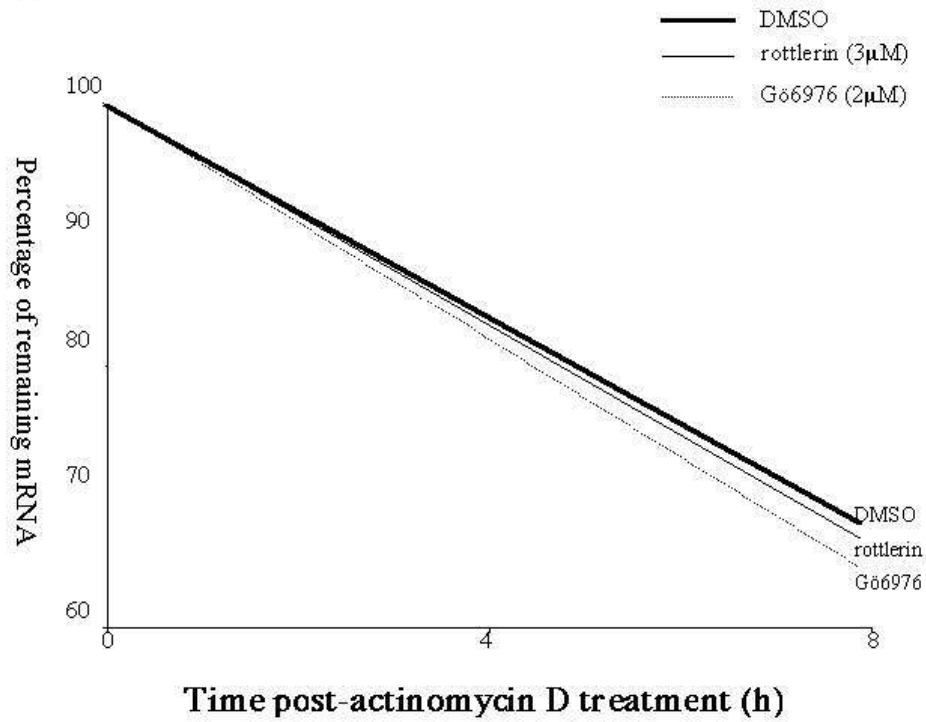

Fig.S1-E

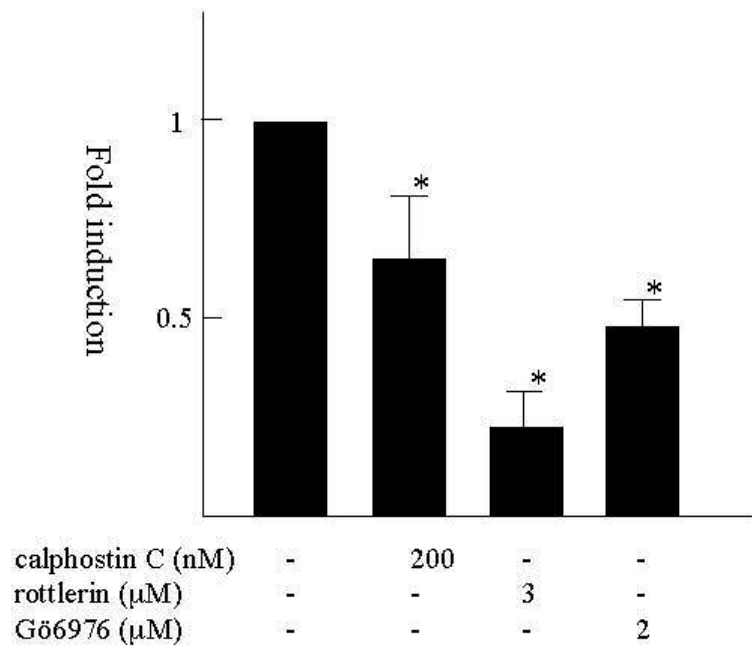

Fig.S1-F

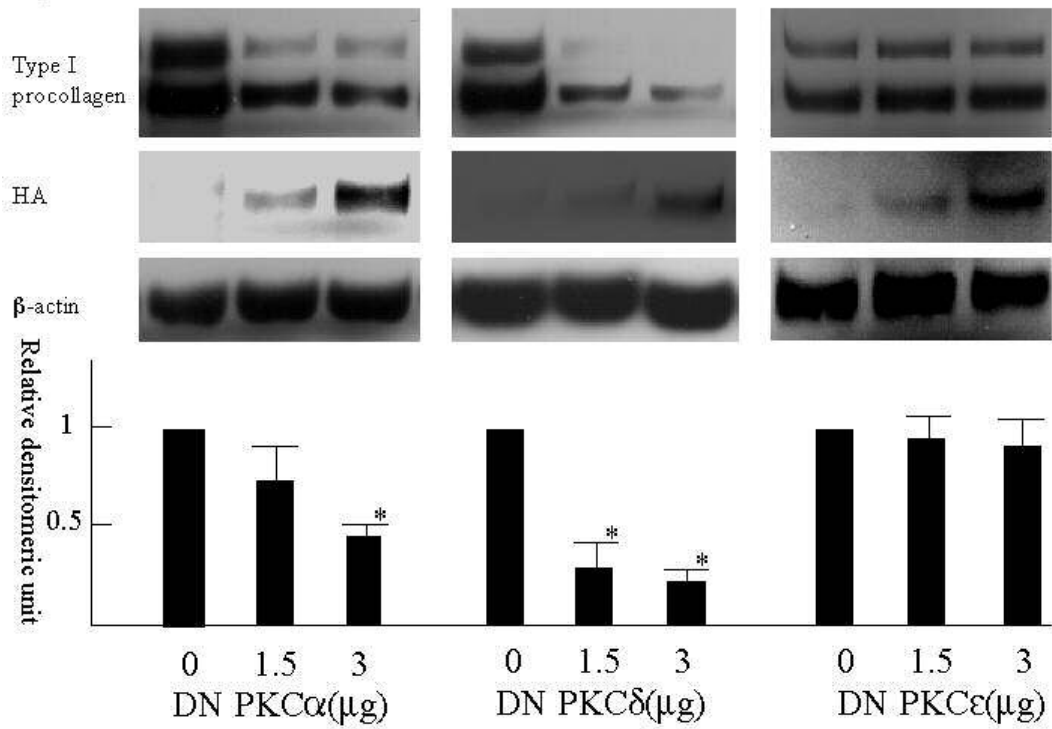

Supplement: nar_33_4_1337__1.pdf [file nar_33_4_1337__1.pdf]
